# Supplementary material
Source: publisher figshare collection journal article supplement (https://acs.figshare.com/ndownloader/files/4748083)
Supplement: Supplementary file 1 [file 4748083]

data_global


#==============================================================================
#                          1. SUBMISSION DETAILS
#==============================================================================


_publ_contact_author_name   'Dr Fran\,cois Brisse'

_publ_contact_author_address
;
      Universit\'e de Montr\'eal
      D\'epartement de Chimie
      C.P. 6128, Succ. Centre-ville
      Montr\'eal, Qu\'ebec
      Canada, H3C 3J7
;


_publ_contact_author_phone        '+1 514 343 2088'
_publ_contact_author_fax          '+1 514 343 7586'
_publ_contact_author_email        'francois.brisse@umontreal.ca'

_publ_requested_journal           'Acta Crystallographica C'
_publ_requested_category          'FO'


_publ_requested_coeditor_name
;
     Dr Anthony Linden
     Institute of Organic Chemistry
     University of Zurich
     Winterthurerstrasse 190
     CH-8057 Zurich, Switzerland
;


_publ_contact_letter
;

Please consider this CIF submission for publication in Acta Crystallographica
Section C.  All authors have seen and approved of this submission.

The CIF has passed the Chester CHECKCIF routines and gives a satisfactory
PRINTCIF file.

When I hear back from you by e-mail with your reference number I will fax and
air-mail a formal Letter of Submission and a signed Copyright Transfer Form.

I will then ftp the Artwork and Structure Factor Listing to you (as Postscript
and ASCII files respectively).


                 
;

#==============================================================================
#                   2. PROCESSING SUMMARY (IUCr Office Use Only)
#==============================================================================


_journal_date_recd_electronic     ?

_journal_date_to_coeditor         ?
_journal_date_from_coeditor       ?
_journal_date_accepted            ?

_journal_date_printers_first      ?
_journal_date_printers_final      ?
_journal_date_proofs_out          ?
_journal_date_proofs_in           ?

_journal_coeditor_name            ?
_journal_coeditor_code            ?
_journal_coeditor_notes
; ?
;

_journal_techeditor_code          ?
_journal_techeditor_notes
; ?
;

_journal_coden_ASTM               ?
_journal_name_full                ?
_journal_year                     ?
_journal_volume                   ?
_journal_issue                    ?
_journal_page_first               ?
_journal_page_last                ?

_journal_suppl_publ_number        ?
_journal_suppl_publ_pages         ?

#==============================================================================
#                        3. TITLE AND AUTHOR LIST
#==============================================================================


_publ_section_title
;
Structure of Complex2
;

# The loop structure below should contain the names and addresses of all
# authors, in the required order of publication. Repeat as necessary.

loop_
    _publ_author_name
    _publ_author_address
     'Brisse, Fran\,cois'
;
      D\'epartement de Chimie
      Universit\'e de Montr\'eal
      C.P. 6128, Succ. Centre-ville,
      Montr\'eal, Qu\'ebec
      Canada H3C 3J7

;
      'Mohamed Osman, Awaleh' 
;
      D\'epartement de Chimie
      Universit\'e de Montr\'eal
      C.P. 6128, Succ. Centre-ville,
      Montr\'eal, Qu\'ebec
      Canada H3C 3J7

; 
      'Antonnella, Badia' 
;
      D\'epartement de Chimie
      Universit\'e de Montr\'eal
      C.P. 6128, Succ. Centre-ville,
      Montr\'eal, Qu\'ebec
      Canada H3C 3J7

;
#==============================================================================
#                              4. TEXT
#==============================================================================


_publ_section_abstract
;
 Here should be written a short abstract
;


_publ_section_comment
;
 Here should be written the text  of the article
;


_publ_section_exptl_prep
;
 Small details about the preparation of the compound.
;


_publ_section_exptl_refinement
;

All non-H atoms were refined by full-matrix least-squares
with anisotropic displacement parameters. The H atoms were 
generated geometrically (C-H 0.98 to 0.99\%A)
and were included in the refinement in the riding model approximation; 
their temperature factors were set to 1.5 times those of the 
equivalent isotropic temperature factors of the parent site (methyl) 
and 1.2 times for others. 
A final verification of possible voids was performed using the VOID routine 
of the PLATON program (Spek, 2000). 
  

;


_publ_section_references
;

 
 Bruker (1997). SHELXTL (1997). Release 5.10; The Complete Software Package 
 for Single Crystal Structure Determination.  Bruker AXS Inc.,
 Madison, USA.

 Bruker (1999a). SAINT Release 6.06. Integration Software for Single Crystal 
 Data. Bruker AXS Inc., Madison, USA.

 Bruker (1999b). SMART Release 5.059; Bruker Molecular Analysis Research Tool,
 Bruker AXS Inc., Madison, USA.

 Flack, H. D. (1983). Acta Cryst. A39, 876-881.

 Flack, H. D. and Schwarzenbach, D. (1988). Acta Cryst. A44, 499-506.

 Sheldrick, G. M. (1986). SHELXS86. Program for Crystal Structure
 solution. University of G\"ottingen, Germany.

 Sheldrick, G. M. (1996). SADABS, Bruker Area Detector Absorption Corrections.
 Bruker AXS Inc., Madison, USA.

 Sheldrick, G. M. (1997a). SHELXS97. Program for Crystal Structure
 solution. University of G\"ottingen, Germany.

 Sheldrick, G. M. (1997b). SHELXL97. Program for crystal structure
 refinement. University of G\"ottingen, Germany.

 Spek, A. L. (2000). PLATON,  2000 version; Molecular Geometry Program,
 University of Utrecht, Utrecht, Holland.


;


_publ_section_figure_captions
;
Fig 1 Ortep view of the title compound.
      Thermal ellipsoids are shown at 30% probability levels.
;


_publ_section_table_legends
;
Table 1.  Selected geometric parameters (\%A, \%) for the title compound.
;


_publ_section_acknowledgements
;
We are grateful to the Natural Sciences and Engineering Research
Council of Canada and the Minist\`ere de l'Education du Qu\'ebec
for financial support.
;

# ========================================================
#                     STRUCTURAL DATA                     
# ========================================================


 
data_Complex2 
 
_audit_creation_method            SHELXL-97 
_chemical_name_systematic 
; 
 ? 
; 
_chemical_name_common             ? 
_chemical_melting_point           ? 
_chemical_formula_moiety
 'C6 H16 Ag2 Cl2 O8 S4'
_chemical_formula_sum 
 'C6 H16 Ag2 Cl2 O8 S4' 
_chemical_formula_weight          631.07 
_chemical_compound_source         'Synthesized by the authors. See text'

loop_ 
 _atom_type_symbol 
 _atom_type_description 
 _atom_type_scat_dispersion_real 
 _atom_type_scat_dispersion_imag 
 _atom_type_scat_source 
 'C'  'C'   0.0181   0.0091 
 'International Tables Vol C Tables 4.2.6.8 and 6.1.1.4' 
 'H'  'H'   0.0000   0.0000 
 'International Tables Vol C Tables 4.2.6.8 and 6.1.1.4' 
 'O'  'O'   0.0492   0.0322 
 'International Tables Vol C Tables 4.2.6.8 and 6.1.1.4' 
 'S'  'S'   0.3331   0.5567 
 'International Tables Vol C Tables 4.2.6.8 and 6.1.1.4' 
 'Cl'  'Cl'   0.3639   0.7018 
 'International Tables Vol C Tables 4.2.6.8 and 6.1.1.4' 
 'Ag'  'Ag'   0.1306   4.2820 
 'International Tables Vol C Tables 4.2.6.8 and 6.1.1.4' 
 
_symmetry_cell_setting            Orthorhombic
_symmetry_space_group_name_H-M    Pca21
_symmetry_space_group_name_hall   'P 2c -2ac'
 
loop_ 
 _symmetry_equiv_pos_as_xyz 
 'x, y, z' 
 '-x, -y, z+1/2' 
 'x+1/2, -y, z' 
 '-x+1/2, y, z+1/2' 
 
_cell_length_a                    20.89950(10) 
_cell_length_b                    8.89010(10) 
_cell_length_c                    9.45670(10) 
_cell_angle_alpha                 90.00 
_cell_angle_beta                  90.00 
_cell_angle_gamma                 90.00 
_cell_volume                      1757.04(3) 
_cell_formula_units_Z             4 
_cell_measurement_temperature     100(2)
_cell_measurement_reflns_used     19495
_cell_measurement_theta_min        4.23
_cell_measurement_theta_max       72.77
 
_exptl_crystal_description        needle
_exptl_crystal_colour             Colorless
_exptl_crystal_size_max           0.14
_exptl_crystal_size_mid           0.09
_exptl_crystal_size_min           0.05
_exptl_crystal_density_meas          ?
_exptl_crystal_density_diffrn     2.386 
_exptl_crystal_density_method     'not measured' 
_exptl_crystal_F_000              1232 
_exptl_absorpt_coefficient_mu     25.439 
_exptl_absorpt_correction_Type    multi-scan
_exptl_absorpt_correction_T_min   0.083
_exptl_absorpt_correction_T_max   0.280
_exptl_absorpt_process_details    'Sadabs (Sheldrick,1996)'
 
_exptl_special_details
;
X-ray crystallographic data for I were collected from a single crystal
sample, which was mounted on a loop fiber. Data were collected using
a Bruker Platform diffractometer, equipped with a Bruker SMART 2K
Charged-Coupled Device (CCD) Area Detector using the program SMART and
normal focus sealed tube source graphite monochromated Cu-K\a radiation.
The crystal-to-detector distance was 4.908 cm, and the data collection
was carried out in 512 x 512 pixel mode, utilizing 4 x 4 pixel binning.
The initial unit cell parameters were determined by a least-squares fit
of the angular setting of strong reflections, collected by a 9.0 degree
scan in 30 frames over four different parts of the reciprocal space
(120 frames total).  One complete sphere of data was collected, to
better than 0.8\%A resolution.  Upon completion of the data collection,
the first 101 frames were recollected in order to improve the decay
correction analysis.
;
 
_diffrn_ambient_temperature       100(2)
_diffrn_radiation_wavelength      1.54178 
_diffrn_radiation_type            CuK\a 
_diffrn_radiation_source          'X-ray Sealed Tube'
_diffrn_radiation_monochromator   'graphite'
_diffrn_measurement_device_type   'Bruker Smart 2000'
_diffrn_measurement_method        '\w'
_diffrn_detector_area_resol_mean   5.5
_diffrn_standards_number          172
_diffrn_standards_interval_count  ? 
_diffrn_standards_interval_time   ? 
_diffrn_standards_decay_%          -0.13
_diffrn_reflns_number             21185
_diffrn_reflns_av_R_equivalents   0.069
_diffrn_reflns_av_sigmaI/netI     0.0418 
_diffrn_reflns_limit_h_min        -25
_diffrn_reflns_limit_h_max        25
_diffrn_reflns_limit_k_min        -10
_diffrn_reflns_limit_k_max        10
_diffrn_reflns_limit_l_min        -10
_diffrn_reflns_limit_l_max        11
_diffrn_reflns_theta_min          4.23 
_diffrn_reflns_theta_max          72.75 
_reflns_number_total              3106
_reflns_number_gt                 3088
_reflns_threshold_expression      'I>2\s(I)'
 
_computing_data_collection        'SMART (Bruker, 1999)'
_computing_cell_refinement        'SMART (Bruker, 1999)'
_computing_data_reduction         'SAINT (Bruker, 1999)'
_computing_structure_solution     'SHELXS97 (Sheldrick, 1997)'
_computing_structure_refinement   'SHELXL97 (Sheldrick, 1997)'
_computing_molecular_graphics     'SHELXTL (Bruker, 1997)'
_computing_publication_material   'UdMX (local program)'
 
_refine_special_details 
; 
 Refinement of F^2^ against ALL reflections.  The weighted R-factor wR and 
 goodness of fit S are based on F^2^, conventional R-factors R are based 
 on F, with F set to zero for negative F^2^. The threshold expression of 
 F^2^ > 2sigma(F^2^) is used only for calculating R-factors(gt) etc. and is 
 not relevant to the choice of reflections for refinement.  R-factors based 
 on F^2^ are statistically about twice as large as those based on F, and R- 
 factors based on ALL data will be even larger. 
; 
 
_refine_ls_structure_factor_coef  Fsqd  
_refine_ls_matrix_type            full 
_refine_ls_weighting_scheme       calc  
_refine_ls_weighting_details 
 'calc w=1/[\s^2^(Fo^2^)+(0.0971P)^2^+1.7213P] where P=(Fo^2^+2Fc^2^)/3' 
_atom_sites_solution_primary      direct 
_atom_sites_solution_secondary    difmap 
_atom_sites_solution_hydrogens    geom 
_refine_ls_hydrogen_treatment     constr
_refine_ls_extinction_method      none 
_refine_ls_extinction_coef        ? 
_refine_ls_abs_structure_details
     'Flack H D (1983), 1252 Friedel Pairs'
_refine_ls_abs_structure_Flack    0.030(11) 
_refine_ls_number_reflns          3106 
_refine_ls_number_parameters      203 
_refine_ls_number_restraints      1 
_refine_ls_R_factor_all           0.0457 
_refine_ls_R_factor_gt            0.0451 
_refine_ls_wR_factor_ref          0.1124 
_refine_ls_wR_factor_gt           0.1122 
_refine_ls_goodness_of_fit_ref    1.017 
_refine_ls_restrained_S_all       1.017 
_refine_ls_shift/su_max           0.001 
_refine_ls_shift/su_mean          0.000 
 
loop_ 
 _atom_site_label 
 _atom_site_type_symbol 
 _atom_site_fract_x 
 _atom_site_fract_y 
 _atom_site_fract_z 
 _atom_site_U_iso_or_equiv 
 _atom_site_adp_type 
 _atom_site_occupancy 
 _atom_site_symmetry_multiplicity 
 _atom_site_calc_flag 
 _atom_site_refinement_flags 
 _atom_site_disorder_assembly 
 _atom_site_disorder_group 
Ag2 Ag 0.53658(2) 0.52156(5) 0.63729(6) 0.01542(15) Uani 1 1 d . . . 
Ag1 Ag 0.33660(2) 0.45739(5) 0.76076(6) 0.01539(15) Uani 1 1 d . . . 
S2 S 0.42097(7) 0.61576(15) 0.63620(19) 0.0122(3) Uani 1 1 d . . . 
S3 S 0.54672(8) 0.32589(18) 0.83000(18) 0.0148(3) Uani 1 1 d . . . 
Cl2 Cl 0.45857(7) 0.21566(16) 0.4634(2) 0.0156(3) Uani 1 1 d . . . 
S4 S 0.62671(7) 0.64122(16) 0.50425(18) 0.0127(3) Uani 1 1 d . . . 
Cl1 Cl 0.27981(8) 0.74401(16) 0.94724(19) 0.0168(3) Uani 1 1 d . . . 
S1 S 0.26903(7) 0.31843(17) 0.57881(19) 0.0142(3) Uani 1 1 d . . . 
O2 O 0.2463(3) 0.7484(7) 1.0789(7) 0.0305(12) Uani 1 1 d . . . 
C21 C 0.4127(3) 0.8164(7) 0.6647(7) 0.0178(14) Uani 1 1 d . . . 
H21A H 0.4405 0.8707 0.5989 0.027 Uiso 1 1 calc R . . 
H21B H 0.4248 0.8409 0.7621 0.027 Uiso 1 1 calc R . . 
H21C H 0.3681 0.8462 0.6486 0.027 Uiso 1 1 calc R . . 
C22 C 0.3957(3) 0.5971(7) 0.4536(8) 0.0125(11) Uani 1 1 d . . . 
H22A H 0.3890 0.4893 0.4319 0.015 Uiso 1 1 calc R . . 
H22B H 0.3543 0.6494 0.4410 0.015 Uiso 1 1 calc R . . 
O3 O 0.3469(3) 0.7114(7) 0.9722(7) 0.0311(13) Uani 1 1 d . . . 
O4 O 0.2541(3) 0.6206(5) 0.8652(6) 0.0218(11) Uani 1 1 d . . . 
O7 O 0.4931(2) 0.0758(5) 0.4565(6) 0.0209(10) Uani 1 1 d . . . 
O1 O 0.2741(3) 0.8837(6) 0.8735(7) 0.0327(14) Uani 1 1 d . . . 
C32 C 0.5902(4) 0.1647(7) 0.7606(10) 0.0262(16) Uani 1 1 d . . . 
H32A H 0.6267 0.1998 0.7047 0.039 Uiso 1 1 calc R . . 
H32B H 0.5617 0.1049 0.7005 0.039 Uiso 1 1 calc R . . 
H32C H 0.6055 0.1027 0.8393 0.039 Uiso 1 1 calc R . . 
C41 C 0.6911(3) 0.6184(7) 0.6331(8) 0.0122(11) Uani 1 1 d . . . 
H41A H 0.6791 0.6734 0.7202 0.015 Uiso 1 1 calc R . . 
H41B H 0.6941 0.5104 0.6579 0.015 Uiso 1 1 calc R . . 
O8 O 0.5016(2) 0.3397(5) 0.4336(6) 0.0231(12) Uani 1 1 d . . . 
O5 O 0.4319(3) 0.2358(6) 0.6022(6) 0.0263(13) Uani 1 1 d . . . 
C11 C 0.2709(4) 0.1294(8) 0.6497(11) 0.0261(16) Uani 1 1 d . . . 
H11A H 0.2454 0.1253 0.7365 0.039 Uiso 1 1 calc R . . 
H11B H 0.3152 0.1012 0.6708 0.039 Uiso 1 1 calc R . . 
H11C H 0.2530 0.0594 0.5800 0.039 Uiso 1 1 calc R . . 
O6 O 0.4080(3) 0.2164(6) 0.3600(7) 0.0325(14) Uani 1 1 d . . . 
C42 C 0.6146(3) 0.8433(7) 0.4994(9) 0.0201(15) Uani 1 1 d . . . 
H42A H 0.6059 0.8801 0.5952 0.030 Uiso 1 1 calc R . . 
H42B H 0.5781 0.8666 0.4380 0.030 Uiso 1 1 calc R . . 
H42C H 0.6531 0.8922 0.4624 0.030 Uiso 1 1 calc R . . 
 
loop_ 
 _atom_site_aniso_label 
 _atom_site_aniso_U_11 
 _atom_site_aniso_U_22 
 _atom_site_aniso_U_33 
 _atom_site_aniso_U_23 
 _atom_site_aniso_U_13 
 _atom_site_aniso_U_12 
Ag2 0.0116(2) 0.0108(2) 0.0238(3) 0.0027(2) -0.00113(18) -0.00099(14) 
Ag1 0.0129(3) 0.0105(2) 0.0228(3) -0.00155(19) 0.00114(19) -0.00155(14) 
S2 0.0110(6) 0.0049(6) 0.0207(7) -0.0005(6) 0.0005(6) -0.0010(5) 
S3 0.0168(7) 0.0080(7) 0.0198(8) -0.0010(6) 0.0003(6) -0.0004(5) 
Cl2 0.0153(6) 0.0054(6) 0.0262(9) -0.0006(6) -0.0027(6) 0.0016(5) 
S4 0.0096(6) 0.0067(7) 0.0219(9) 0.0005(6) 0.0008(6) 0.0012(5) 
Cl1 0.0197(7) 0.0078(6) 0.0229(8) -0.0005(6) 0.0012(6) -0.0007(5) 
S1 0.0114(7) 0.0072(7) 0.0238(8) -0.0014(6) -0.0005(6) 0.0018(5) 
O2 0.033(3) 0.029(3) 0.029(3) -0.004(3) 0.007(3) 0.002(3) 
C21 0.023(3) 0.008(3) 0.023(4) 0.001(2) 0.001(3) 0.002(2) 
C22 0.012(3) 0.009(3) 0.016(3) 0.000(3) 0.007(2) -0.003(2) 
O3 0.027(3) 0.025(3) 0.041(4) -0.006(3) 0.002(3) -0.001(2) 
O4 0.018(2) 0.009(2) 0.039(4) -0.008(2) 0.001(2) -0.0012(19) 
O7 0.026(3) 0.008(2) 0.029(3) -0.001(2) 0.001(2) 0.0052(19) 
O1 0.056(4) 0.007(2) 0.035(4) 0.000(2) -0.005(3) -0.001(2) 
C32 0.041(4) 0.008(3) 0.030(4) -0.001(3) 0.001(4) 0.002(3) 
C41 0.008(3) 0.011(3) 0.018(3) -0.001(3) -0.004(2) 0.004(2) 
O8 0.028(3) 0.006(2) 0.035(3) -0.002(2) 0.000(2) -0.0041(18) 
O5 0.024(3) 0.013(2) 0.043(4) -0.004(2) 0.008(2) -0.0040(19) 
C11 0.024(3) 0.008(3) 0.046(5) 0.006(3) -0.012(4) 0.004(2) 
O6 0.034(3) 0.016(3) 0.047(4) -0.006(2) -0.018(3) 0.006(2) 
C42 0.021(3) 0.009(3) 0.031(4) 0.000(3) -0.003(3) 0.007(2) 
 
_geom_special_details 
; 
 All esds (except the esd in the dihedral angle between two l.s. planes) 
 are estimated using the full covariance matrix.  The cell esds are taken 
 into account individually in the estimation of esds in distances, angles 
 and torsion angles; correlations between esds in cell parameters are only 
 used when they are defined by crystal symmetry.  An approximate (isotropic) 
 treatment of cell esds is used for estimating esds involving l.s. planes. 
; 
 


loop_                                         
        _geom_bond_atom_site_label_1          
        _geom_bond_atom_site_label_2          
        _geom_bond_site_symmetry_1            
        _geom_bond_site_symmetry_2            
        _geom_bond_distance                   
        _geom_bond_publ_flag                  
Ag2            S4             .              .                   2.5025(16)   Y
Ag2            S3             .              .                   2.5283(17)   Y
Ag2            S2             .              .                   2.5574(14)   Y
Ag2            O8             .              .                     2.619(5)   Y
Ag1            O4             .              .                     2.461(5)   Y
Ag1            S2             .              .                   2.5453(15)   Y
Ag1            S1             .              .                   2.5458(17)   Y
Ag1            S4             .              2_665               2.5805(17)   Y
S2             C21            .              .                     1.813(7)   Y
S2             C22            .              .                     1.814(8)   Y
S3             C22            .              2_665                 1.812(7)   Y
S3             C32            .              .                     1.818(7)   Y
Cl2            O5             .              .                     1.438(6)   Y
Cl2            O6             .              .                     1.439(6)   Y
Cl2            O7             .              .                     1.439(5)   Y
Cl2            O8             .              .                     1.450(5)   Y
S4             C42            .              .                     1.815(7)   Y
S4             C41            .              .                     1.827(6)   Y
S4             Ag1            .              2_664               2.5805(17)   Y
Cl1            O2             .              .                     1.428(7)   Y
Cl1            O1             .              .                     1.429(6)   Y
Cl1            O4             .              .                     1.447(5)   Y
Cl1            O3             .              .                     1.452(6)   Y
S1             C41            .              3_465                 1.798(6)   Y
S1             C11            .              .                     1.809(7)   Y
C21            H21a           .              .                         0.98   ?
C21            H21b           .              .                         0.98   ?
C21            H21c           .              .                         0.98   ?
C22            S3             .              2_664                 1.812(7)   Y
C22            H22a           .              .                         0.99   ?
C22            H22b           .              .                         0.99   ?
C32            H32a           .              .                         0.98   ?
C32            H32b           .              .                         0.98   ?
C32            H32c           .              .                         0.98   ?
C41            S1             .              3_565                 1.798(6)   Y
C41            H41a           .              .                         0.99   ?
C41            H41b           .              .                         0.99   ?
C11            H11a           .              .                         0.98   ?
C11            H11b           .              .                         0.98   ?
C11            H11c           .              .                         0.98   ?
C42            H42a           .              .                         0.98   ?
C42            H42b           .              .                         0.98   ?
C42            H42c           .              .                         0.98   ?

loop_                                         
        _geom_angle_atom_site_label_1         
        _geom_angle_atom_site_label_2         
        _geom_angle_atom_site_label_3         
        _geom_angle_site_symmetry_1           
        _geom_angle_site_symmetry_2           
        _geom_angle_site_symmetry_3           
        _geom_angle                           
        _geom_angle_publ_flag                 
S4        AG2       S3        .         .         .          126.28(5)        Y
S4        AG2       S2        .         .         .          124.75(5)        Y
S3        AG2       S2        .         .         .          107.90(5)        Y
S4        AG2       O8        .         .         .          95.91(12)        Y
S3        AG2       O8        .         .         .          97.40(12)        Y
S2        AG2       O8        .         .         .          86.29(12)        Y
O4        AG1       S2        .         .         .         110.19(12)        Y
O4        AG1       S1        .         .         .          99.71(13)        Y
S2        AG1       S1        .         .         .          109.87(6)        Y
O4        AG1       S4        .         .         2_665      92.89(15)        Y
S2        AG1       S4        .         .         2_665      113.27(5)        Y
S1        AG1       S4        .         .         2_665      127.09(5)        Y
C21       S2        C22       .         .         .           101.8(3)        Y
C21       S2        AG1       .         .         .           114.2(2)        Y
C22       S2        AG1       .         .         .         100.86(19)        Y
C21       S2        AG2       .         .         .           114.3(2)        Y
C22       S2        AG2       .         .         .           104.4(2)        Y
AG1       S2        AG2       .         .         .          118.13(6)        Y
C22       S3        C32       2_665     .         .           101.5(3)        Y
C22       S3        AG2       2_665     .         .           105.1(2)        Y
C32       S3        AG2       .         .         .           108.9(3)        Y
O5        CL2       O6        .         .         .           109.6(4)        Y
O5        CL2       O7        .         .         .           110.1(3)        Y
O6        CL2       O7        .         .         .           110.0(3)        Y
O5        CL2       O8        .         .         .           108.8(3)        Y
O6        CL2       O8        .         .         .           108.7(4)        Y
O7        CL2       O8        .         .         .           109.7(3)        Y
C42       S4        C41       .         .         .           103.3(3)        Y
C42       S4        AG2       .         .         .           109.2(3)        Y
C41       S4        AG2       .         .         .            99.9(2)        Y
C42       S4        AG1       .         .         2_664       110.8(3)        Y
C41       S4        AG1       .         .         2_664       109.8(2)        Y
AG2       S4        AG1       .         .         2_664      121.86(6)        Y
O2        CL1       O1        .         .         .           111.1(4)        Y
O2        CL1       O4        .         .         .           107.8(4)        Y
O1        CL1       O4        .         .         .           111.5(4)        Y
O2        CL1       O3        .         .         .           109.7(4)        Y
O1        CL1       O3        .         .         .           109.5(4)        Y
O4        CL1       O3        .         .         .           107.1(3)        Y
C41       S1        C11       3_465     .         .           101.7(3)        Y
C41       S1        AG1       3_465     .         .            99.1(2)        Y
C11       S1        AG1       .         .         .           100.9(3)        Y
S2        C21       H21A      .         .         .              109.5        ?
S2        C21       H21B      .         .         .              109.5        ?
H21A      C21       H21B      .         .         .              109.5        ?
S2        C21       H21C      .         .         .              109.5        ?
H21A      C21       H21C      .         .         .              109.5        ?
H21B      C21       H21C      .         .         .              109.5        ?
S3        C22       S2        2_664     .         .           112.7(3)        Y
S3        C22       H22A      2_664     .         .                109        ?
S2        C22       H22A      .         .         .                109        ?
S3        C22       H22B      2_664     .         .                109        ?
S2        C22       H22B      .         .         .                109        ?
H22A      C22       H22B      .         .         .              107.8        ?
CL1       O4        AG1       .         .         .           113.7(3)        Y
S3        C32       H32A      .         .         .              109.5        ?
S3        C32       H32B      .         .         .              109.5        ?
H32A      C32       H32B      .         .         .              109.5        ?
S3        C32       H32C      .         .         .              109.5        ?
H32A      C32       H32C      .         .         .              109.5        ?
H32B      C32       H32C      .         .         .              109.5        ?
S1        C41       S4        3_565     .         .           116.2(4)        Y
S1        C41       H41A      3_565     .         .              108.2        ?
S4        C41       H41A      .         .         .              108.2        ?
S1        C41       H41B      3_565     .         .              108.2        ?
S4        C41       H41B      .         .         .              108.2        ?
H41A      C41       H41B      .         .         .              107.4        ?
CL2       O8        AG2       .         .         .           120.0(3)        Y
S1        C11       H11A      .         .         .              109.5        ?
S1        C11       H11B      .         .         .              109.5        ?
H11A      C11       H11B      .         .         .              109.5        ?
S1        C11       H11C      .         .         .              109.5        ?
H11A      C11       H11C      .         .         .              109.5        ?
H11B      C11       H11C      .         .         .              109.5        ?
S4        C42       H42A      .         .         .              109.5        ?
S4        C42       H42B      .         .         .              109.5        ?
H42A      C42       H42B      .         .         .              109.5        ?
S4        C42       H42C      .         .         .              109.5        ?
H42A      C42       H42C      .         .         .              109.5        ?
H42B      C42       H42C      .         .         .              109.5        ?

loop_                                         
        _geom_torsion_atom_site_label_1       
        _geom_torsion_atom_site_label_2       
        _geom_torsion_atom_site_label_3       
        _geom_torsion_atom_site_label_4       
        _geom_torsion_site_symmetry_1         
        _geom_torsion_site_symmetry_2         
        _geom_torsion_site_symmetry_3         
        _geom_torsion_site_symmetry_4         
        _geom_torsion                         
        _geom_torsion_publ_flag               
O4      AG1     S2      C21     .       .       .       .            7.8(3)   ?
S1      AG1     S2      C21     .       .       .       .          116.7(3)   ?
S4      AG1     S2      C21     2_665   .       .       .          -94.7(3)   ?
O4      AG1     S2      C22     .       .       .       .         -100.4(2)   ?
S1      AG1     S2      C22     .       .       .       .            8.5(2)   ?
S4      AG1     S2      C22     2_665   .       .       .          157.0(2)   ?
O4      AG1     S2      AG2     .       .       .       .        146.60(16)   ?
S1      AG1     S2      AG2     .       .       .       .        -104.50(7)   ?
S4      AG1     S2      AG2     2_665   .       .       .          44.09(9)   ?
S4      AG2     S2      C21     .       .       .       .          -47.4(3)   ?
S3      AG2     S2      C21     .       .       .       .          121.4(3)   ?
O8      AG2     S2      C21     .       .       .       .         -142.1(3)   ?
S4      AG2     S2      C22     .       .       .       .           62.9(2)   ?
S3      AG2     S2      C22     .       .       .       .         -128.3(2)   ?
O8      AG2     S2      C22     .       .       .       .          -31.7(2)   ?
S4      AG2     S2      AG1     .       .       .       .         173.87(6)   ?
S3      AG2     S2      AG1     .       .       .       .         -17.33(9)   ?
O8      AG2     S2      AG1     .       .       .       .         79.25(13)   ?
S4      AG2     S3      C22     .       .       .       2_665       50.9(2)   ?
S2      AG2     S3      C22     .       .       .       2_665     -117.7(2)   ?
O8      AG2     S3      C22     .       .       .       2_665      153.9(3)   ?
S4      AG2     S3      C32     .       .       .       .          -57.1(3)   ?
S2      AG2     S3      C32     .       .       .       .          134.3(3)   ?
O8      AG2     S3      C32     .       .       .       .           45.8(3)   ?
S3      AG2     S4      C42     .       .       .       .         -132.7(3)   ?
S2      AG2     S4      C42     .       .       .       .           34.0(3)   ?
O8      AG2     S4      C42     .       .       .       .          123.6(3)   ?
S3      AG2     S4      C41     .       .       .       .          -24.8(2)   ?
S2      AG2     S4      C41     .       .       .       .          141.9(2)   ?
O8      AG2     S4      C41     .       .       .       .         -128.5(2)   ?
S3      AG2     S4      AG1     .       .       .       2_664      96.06(9)   ?
S2      AG2     S4      AG1     .       .       .       2_664     -97.21(8)   ?
O8      AG2     S4      AG1     .       .       .       2_664     -7.64(13)   ?
O4      AG1     S1      C41     .       .       .       3_465       -9.3(3)   ?
S2      AG1     S1      C41     .       .       .       3_465     -125.0(2)   ?
S4      AG1     S1      C41     2_665   .       .       3_465       91.8(2)   ?
O4      AG1     S1      C11     .       .       .       .         -113.2(3)   ?
S2      AG1     S1      C11     .       .       .       .          131.0(3)   ?
S4      AG1     S1      C11     2_665   .       .       .          -12.1(3)   ?
C21     S2      C22     S3      .       .       .       2_664       71.2(4)   ?
AG1     S2      C22     S3      .       .       .       2_664     -171.1(3)   ?
AG2     S2      C22     S3      .       .       .       2_664      -48.0(3)   ?
O2      CL1     O4      AG1     .       .       .       .         -132.3(4)   ?
O1      CL1     O4      AG1     .       .       .       .          105.5(4)   ?
O3      CL1     O4      AG1     .       .       .       .          -14.3(4)   ?
S2      AG1     O4      CL1     .       .       .       .          -48.7(4)   ?
S1      AG1     O4      CL1     .       .       .       .         -164.2(3)   ?
S4      AG1     O4      CL1     2_665   .       .       .           67.4(3)   ?
C42     S4      C41     S1      .       .       .       3_565      -70.5(4)   ?
AG2     S4      C41     S1      .       .       .       3_565      176.9(3)   ?
AG1     S4      C41     S1      2_664   .       .       3_565       47.7(4)   ?
O5      CL2     O8      AG2     .       .       .       .           12.1(4)   ?
O6      CL2     O8      AG2     .       .       .       .          131.3(3)   ?
O7      CL2     O8      AG2     .       .       .       .         -108.4(4)   ?
S4      AG2     O8      CL2     .       .       .       .          166.0(3)   ?
S3      AG2     O8      CL2     .       .       .       .           38.1(3)   ?
S2      AG2     O8      CL2     .       .       .       .          -69.5(3)   ?


_diffrn_measured_fraction_theta_max    0.997 
_diffrn_reflns_theta_full              72.75 
_diffrn_measured_fraction_theta_full   0.997 
_refine_diff_density_max    1.981 
_refine_diff_density_min   -2.136 
_refine_diff_density_rms    0.293 
